# Supplementary material
Source: PubMed Central journal article supplement (PMC3723111)
Supplement: NIHMS484771-supplement-01.pdf [file NIHMS484771-supplement-01.pdf]

**Supplementary Table 1.** Hazard ratios of being males versus females for selected recovery times calculated using SEER-M and NLTCS-M .

| Disease                 | $\tau_d$ <sup>1</sup> | Recovery/Remission |         | Survival <sup>2</sup> |         |
|-------------------------|-----------------------|--------------------|---------|-----------------------|---------|
|                         |                       | SEER-M             | NLTCS-M | SEER-M                | NLTCS-M |
| ACHD                    | 1                     | 1.01**             | 1.02**  |                       |         |
|                         | 2                     | 1.03               | 0.97**  | 1.18                  | 1.40    |
|                         | 3                     | 1.06               | 0.99**  |                       |         |
| Stroke                  | 1                     | 1.07               | 1.12*   |                       |         |
|                         | 2                     | 1.05               | 1.11*   | 1.24                  | 1.22    |
|                         | 3                     | 1.01**             | 1.35    |                       |         |
| Ulcer                   | 1                     | 1.03*              | 1.32    |                       |         |
|                         | 2                     | 1.02*              | 1.18*   | 1.40                  | 1.14**  |
|                         | 3                     | 1.05               | 1.36    |                       |         |
| Melanoma                | 1                     | 1.01**             | 1.07**  |                       |         |
|                         | 2                     | 1.03*              | 1.13**  | 1.37                  | 0.81**  |
|                         | 3                     | 0.98**             | 0.94**  |                       |         |
| Lung cancer             | 1                     | 0.92               | 0.73*   |                       |         |
|                         | 2                     | 0.91               | 1.80*   | 1.24                  | 1.29*   |
|                         | 3                     | 0.97*              | 1.84*   |                       |         |
| Colon cancer            | 1                     | 0.99**             | 1.07**  |                       |         |
|                         | 2                     | 0.99**             | 1.15**  | 1.24                  | 1.34*   |
|                         | 3                     | 1.03*              | 1.24**  |                       |         |
| Asthma                  | 1                     | 1.04*              | 1.10**  |                       |         |
|                         | 2                     | 1.10               | 1.20**  | 1.55                  | 1.35*   |
|                         | 3                     | 1.13               | 1.22**  |                       |         |
| Hip fracture            | 1                     | 1.07               | 1.18*   |                       |         |
|                         | 2                     | 1.12               | 1.10**  | 1.72                  | 1.52    |
|                         | 3                     | 1.10               | 1.12**  |                       |         |
| Nephritis/<br>Nephrosis | 1                     | 0.96*              | 1.07**  |                       |         |
|                         | 2                     | 0.99**             | 1.15**  | 1.14                  | 1.17*   |
|                         | 3                     | 0.95*              | 1.28**  |                       |         |

Note: <sup>1</sup> -  $\tau_d$  is the recovery time (in years); <sup>2</sup> - estimates for survival for years 1, 2, and 3 are identical within disease-specific group.

\*—  $0.05 \leq p < 0.3$ ,  $0.3 \geq p > 0.05$ ; \*\*—  $0.3 \leq p$ , and  $p \leq 0.05$  when there is no asterisk.
