# Supplementary material
Source: PubMed Central journal article supplement (PMC3723111)
Supplement: NIHMS484771-supplement-02.pdf [file NIHMS484771-supplement-02.pdf]

Not-Yet-Recovery Probability

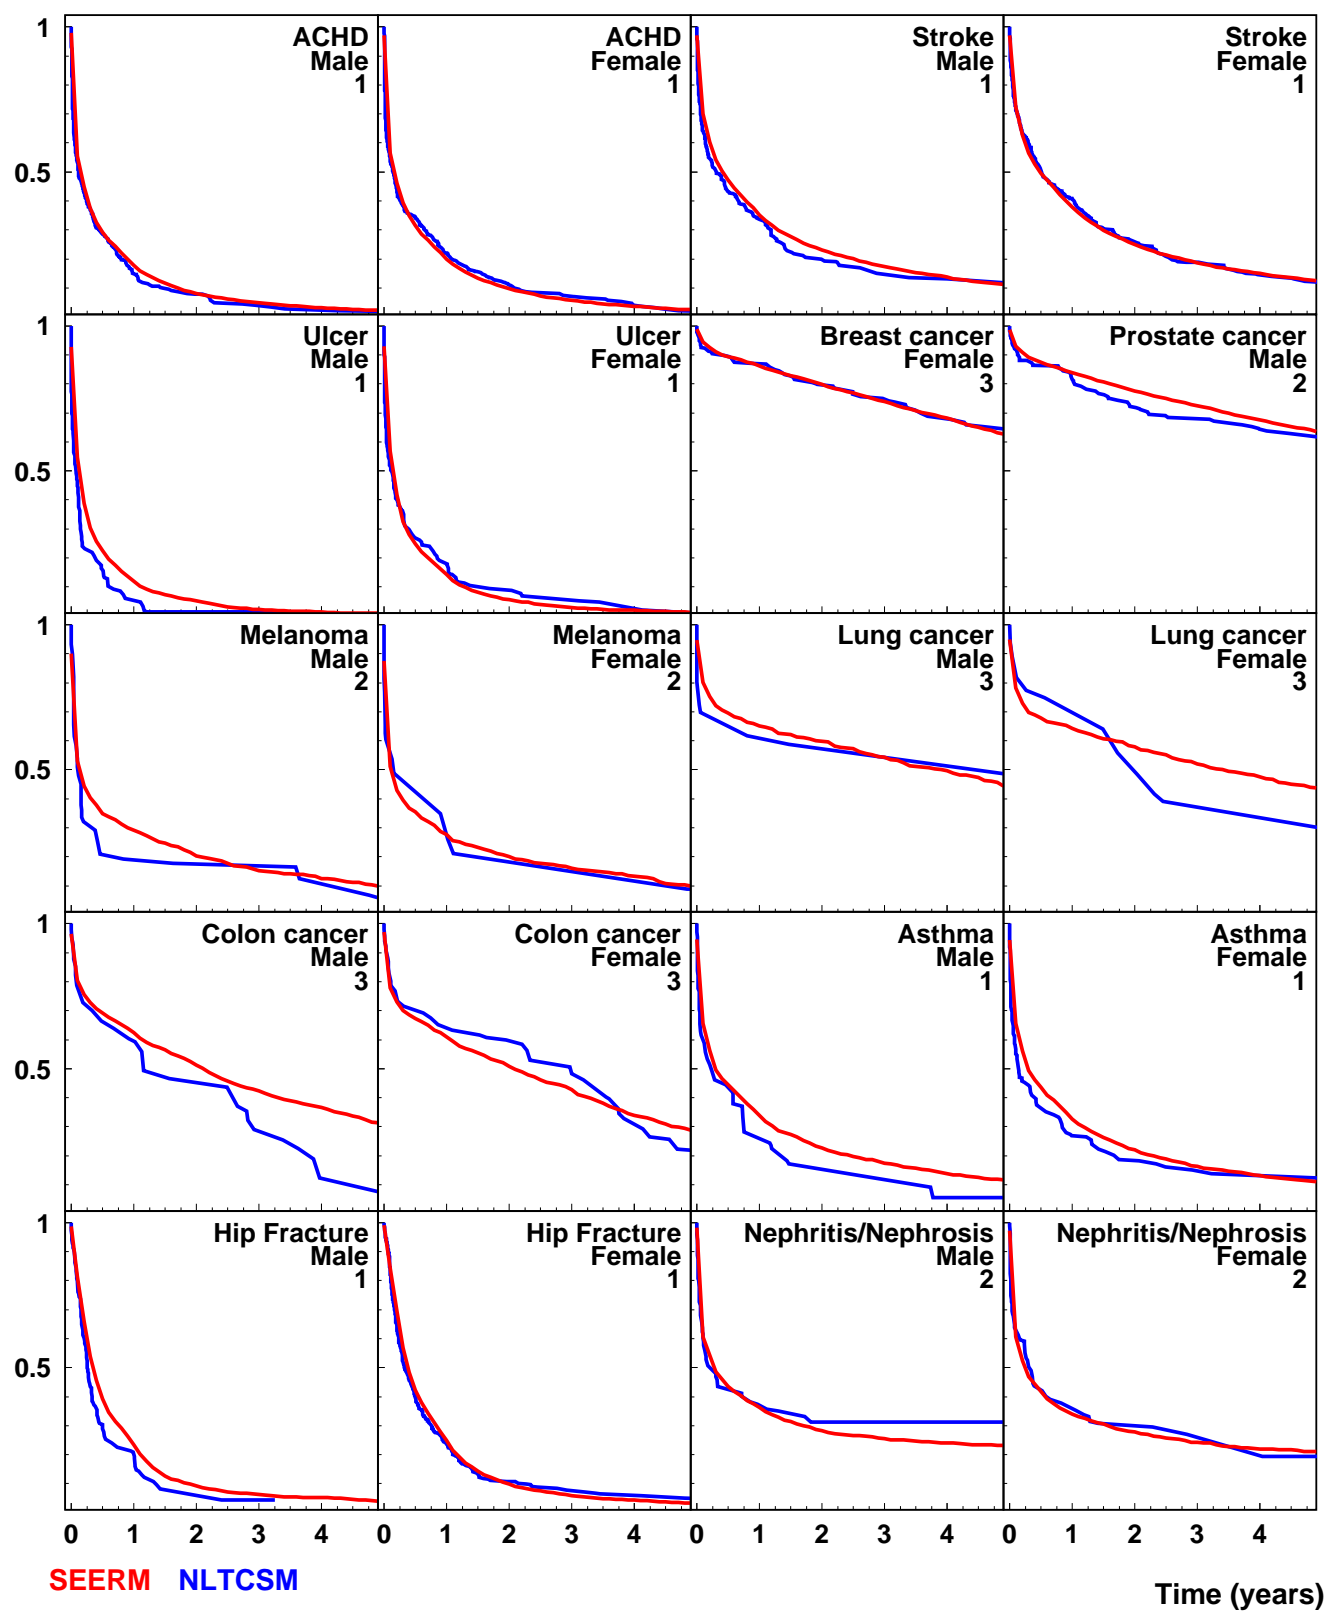

Supplemental Figure 1. The not-yet-recovery probabilities for selected recovery times calculated using SEER-M (red curves) and NLTCM-M (blue curves).
